# Supplementary material
Source: publisher figshare collection journal article supplement (https://gsapubs.figshare.com/ndownloader/files/23304065)
Supplement: Supplementary file 1 [file 23304065]

{"version":"v1.0.0","apwp":{},"data":[{"data":[[4.6,58.1,321,21,"6-1"],[23.3,59.3,321,21,"6-10"],[6.3,37.4,321,21,"6-12"],[13.6,33.6,321,21,"6-14"],[13.1,47.2,321,21,"6-15"],[353.3,56.4,321,21,"6-2"],[27.5,46.9,321,21,"6-4"],[24.6,41.1,321,21,"6-5"],[35.3,54.1,321,21,"6-8"],[55.7,52.8,321,21,"6-9"],[35.7,47.6,321,21,"6-13"],[347.3,61.5,321,21,"6-6"]],"metaData":{"name":"6","dateAdded":"2016-04-13","version":"vALPHA.1511.1","markerColor":"orange","cutoff":"45","type":"Input","description":"Unspecified","author":"Unknown","age":null,"minAge":null,"maxAge":null,"latitude":null,"longitude":null,"sanitized":true}},{"data":[[38.6,52.9,303,15,"7-14"],[15.7,52.1,303,15,"7-15"],[31.4,41.6,303,15,"7-16"],[28.3,38,303,15,"7-3"],[30.4,49.1,303,15,"7-4"],[32.8,50,303,15,"7-5"],[22.9,46.9,303,15,"7-6"],[24.2,42,303,15,"7-7"],[23.9,32.3,303,15,"7-8"],[20,34.3,303,15,"7-9"],[31.1,45.5,303,15,"7-11"],[16.8,50.3,303,15,"7-2"]],"metaData":{"name":"7","dateAdded":"2016-04-13","version":"vALPHA.1511.1","markerColor":"orange","cutoff":"45","type":"Input","description":"Unspecified","author":"Unknown","age":null,"minAge":null,"maxAge":null,"latitude":null,"longitude":null,"sanitized":true}},{"data":[[63.3,29.1,57,17,"8-1"],[69.6,40.7,57,17,"8-10"],[62.9,22.6,57,17,"8-13"],[30.2,36.9,57,17,"8-14"],[68.5,29.2,57,17,"8-2"],[50.6,39.6,57,17,"8-3"],[60.8,33.6,57,17,"8-6"],[69.7,34,57,17,"8-7"],[55.2,34.2,57,17,"8-8"],[62.4,31.8,57,17,"8-9"]],"metaData":{"name":"8","dateAdded":"2016-04-14","version":"vALPHA.1511.1","markerColor":"orange","cutoff":"45","type":"Input","description":"Unspecified","author":"Unknown","age":null,"minAge":null,"maxAge":null,"latitude":null,"longitude":null,"sanitized":true}},{"data":[[26.1,42.6,337,21,"9-12"],[37.4,58.5,337,21,"9-14"],[35.6,49.2,337,21,"9-15"],[25.1,61.7,337,21,"9-16"],[6.4,43.7,337,21,"9-17"],[46.6,47.1,337,21,"9-18"],[18.7,29.8,337,21,"9-2"],[25.3,36.9,337,21,"9-6"],[33.2,35.3,337,21,"9-7"],[20.4,25,337,21,"9-4"],[31.2,21.8,337,21,"9-9"]],"metaData":{"name":"9","dateAdded":"2016-04-13","version":"vALPHA.1511.1","markerColor":"orange","cutoff":"45","type":"Input","description":"Unspecified","author":"Unknown","age":null,"minAge":null,"maxAge":null,"latitude":null,"longitude":null,"sanitized":true}},{"data":[[33.2,28.8,78,26,"10-1"],[10.3,32.2,78,26,"10-12"],[58,15.2,78,26,"10-13"],[62,4.8,78,26,"10-14"],[51.5,28.1,78,26,"10-15"],[11.6,18.7,78,26,"10-5"],[5.7,40.6,78,26,"10-7"],[19,28.7,78,26,"10-8"],[26.7,31.3,78,26,"10-9"],[346.7,14.7,78,26,"10-10"],[27,29,78,26,"10-2"],[22.3,34.1,78,26,"10-10"]],"metaData":{"name":"10","dateAdded":"2016-04-13","version":"vALPHA.1511.1","markerColor":"orange","cutoff":"45","type":"Input","description":"Unspecified","author":"Unknown","age":null,"minAge":null,"maxAge":null,"latitude":null,"longitude":null,"sanitized":true}},{"data":[[31.4,59.5,16,44,"11-1"],[6.3,42.3,16,44,"11-10"],[35.1,53.8,16,44,"11-12"],[350.1,57.6,16,44,"11-13"],[6.7,44.1,16,44,"11-2"],[7.2,44.2,16,44,"11-5"],[4.7,30.8,16,44,"11-6"],[27.1,42.2,16,44,"11-7"],[14.3,42,16,44,"11-8"],[343.3,43.1,16,44,"11-9"],[13.1,46,16,44,"11-14"],[10.7,46.3,16,44,"11-4"]],"metaData":{"name":"11","dateAdded":"2016-04-13","version":"vALPHA.1511.1","markerColor":"orange","cutoff":"45","type":"Input","description":"Unspecified","author":"Unknown","age":null,"minAge":null,"maxAge":null,"latitude":null,"longitude":null,"sanitized":true}},{"data":[[20.5,23.2,55,22,"12-11"],[32.5,26.6,55,22,"12-15"],[26.2,32.9,55,22,"12-2"],[36.8,20.5,55,22,"12-3"],[41.4,13.5,55,22,"12-4"],[45.6,24.6,55,22,"12-7"],[19.9,24,55,22,"12-8"],[27.7,28.5,55,22,"12-13"],[41.8,19.3,55,22,"12-6"]],"metaData":{"name":"12","dateAdded":"2016-04-13","version":"vALPHA.1511.1","markerColor":"orange","cutoff":"45","type":"Input","description":"Unspecified","author":"Unknown","age":null,"minAge":null,"maxAge":null,"latitude":null,"longitude":null,"sanitized":true}},{"data":[[21,34.4,18,34,"13-10"],[19.6,34.7,18,34,"13-11"],[14,35.4,18,34,"13-12"],[6.6,34.1,18,34,"13-13"],[19.9,37.1,18,34,"13-2"],[22.5,36.9,18,34,"13-3"],[10.7,38.6,18,34,"13-5"],[17.6,34.3,18,34,"13-7"],[23.4,33.3,18,34,"13-8"],[24.9,30.4,18,34,"13-9"],[28.9,38,18,34,"13-1"],[17.9,39.5,18,34,"13-6"]],"metaData":{"name":"13","dateAdded":"2016-04-13","version":"vALPHA.1511.1","markerColor":"orange","cutoff":"45","type":"Input","description":"Unspecified","author":"Unknown","age":null,"minAge":null,"maxAge":null,"latitude":null,"longitude":null,"sanitized":true}},{"data":[[17.1,32.3,36,36,"14-11"],[18,38.1,36,36,"14-12"],[23.8,41.2,36,36,"14-13"],[20.6,44.2,36,36,"14-2"],[25.1,32.8,36,36,"14-22"],[13.7,41.1,36,36,"14-5"],[12.7,41.7,36,36,"14-6"],[16.4,39.1,36,36,"14-7"],[32.1,51.6,36,36,"14-8"],[8.6,53,36,36,"14-9"],[58.9,27.7,36,36,"14-10"],[10.5,43,36,36,"14-3"]],"metaData":{"name":"14","dateAdded":"2016-04-13","version":"vALPHA.1511.1","markerColor":"orange","cutoff":"45","type":"Input","description":"Unspecified","author":"Unknown","age":null,"minAge":null,"maxAge":null,"latitude":null,"longitude":null,"sanitized":true}},{"data":[[112.9,61.4,152,23,"52-19"],[26.5,7.2,152,23,"52-8"],[97.7,49.4,152,23,"52-12"],[84.8,27.5,152,23,"52-13"],[85.3,23.6,152,23,"52-14"],[80.8,19.3,152,23,"52-17"],[66.1,16.7,152,23,"52-18"],[33.5,0.6,152,23,"52-2"],[25.1,-1.1,152,23,"52-3"],[35,11,152,23,"52-4"],[26.2,10.7,152,23,"52-6"],[29.1,28.8,152,23,"52-7"]],"metaData":{"name":"52","dateAdded":"2016-04-14","version":"vALPHA.1511.1","markerColor":"orange","cutoff":"45","type":"Input","description":"Unspecified","author":"Unknown","age":null,"minAge":null,"maxAge":null,"latitude":null,"longitude":null,"sanitized":true}},{"data":[[23.4,3.7,131,21,"53-17"],[2.4,8.2,131,21,"53-4"],[22.7,12.2,131,21,"53-1"],[42.5,21.2,131,21,"53-12"],[49,-15.4,131,21,"53-14"],[29,6.3,131,21,"53-16"],[26.4,-6.5,131,21,"53-2"],[17.6,19.3,131,21,"53-3"],[13.6,20.7,131,21,"53-6"],[29.6,-2.8,131,21,"53-7"],[28.2,0.1,131,21,"53-8"],[47.7,-3.5,131,21,"53-9"]],"metaData":{"name":"53","dateAdded":"2016-04-14","version":"vALPHA.1511.1","markerColor":"orange","cutoff":"45","type":"Input","description":"Unspecified","author":"Unknown","age":null,"minAge":null,"maxAge":null,"latitude":null,"longitude":null,"sanitized":true}},{"data":[[0.2,46.4,146,22,"54-13"],[49.3,22.9,146,22,"54-3"],[12,35.9,146,22,"54-11"],[56.7,17.9,146,22,"54-12"],[1.5,39.1,146,22,"54-14"],[36.5,-3.8,146,22,"54-2"],[53,15.9,146,22,"54-4"],[43,55.3,146,22,"54-6"],[56,44.6,146,22,"54-7"],[49.2,24.7,146,22,"54-8"],[59,37.1,146,22,"54-9"]],"metaData":{"name":"54","dateAdded":"2016-04-14","version":"vALPHA.1511.1","markerColor":"orange","cutoff":"45","type":"Input","description":"Unspecified","author":"Unknown","age":null,"minAge":null,"maxAge":null,"latitude":null,"longitude":null,"sanitized":true}},{"data":[[43.5,-4.8,147,38,"55-13"],[43.2,6.8,147,38,"55-6"],[49.4,-2,147,38,"55-1"],[37.5,0.7,147,38,"55-2"],[25.4,3,147,38,"55-14"],[17.4,6,147,38,"55-15"],[52.9,-13.1,147,38,"55-16"],[36.2,-0.7,147,38,"55-3"],[46.1,21,147,38,"55-4"],[37.7,4.1,147,38,"55-5"],[33.2,8.2,147,38,"55-8"],[34.4,-4,147,38,"55-9"]],"metaData":{"name":"55","dateAdded":"2016-04-14","version":"vALPHA.1511.1","markerColor":"orange","cutoff":"45","type":"Input","description":"Unspecified","author":"Unknown","age":null,"minAge":null,"maxAge":null,"latitude":null,"longitude":null,"sanitized":true}},{"data":[[21.9,22.6,131,21,"56-1"],[36.1,40.8,131,21,"56-8"],[24.9,26.1,131,21,"56-10"],[13.9,28.7,131,21,"56-12"],[24.8,24.9,131,21,"56-15"],[42.9,11.5,131,21,"56-2"],[17.3,28.2,131,21,"56-3"],[39.8,30.8,131,21,"56-4"],[71.3,43.4,131,21,"56-5"],[62.6,21.9,131,21,"56-6"],[36.7,15.3,131,21,"56-7"],[357.4,32.2,131,21,"56-8"]],"metaData":{"name":"56","dateAdded":"2016-04-14","version":"vALPHA.1511.1","markerColor":"orange","cutoff":"45","type":"Input","description":"Unspecified","author":"Unknown","age":null,"minAge":null,"maxAge":null,"latitude":null,"longitude":null,"sanitized":true}}]}
